# Supplementary material for: Diet of Eastern Imperial Eagle (Aquilaheliaca) in Bulgaria: composition, distribution and variation
Source: Biodivers Data J. 2022 Jan 10;10:e77746. doi: 10.3897/BDJ.10.e77746 (PMC8763811; doi:10.3897/BDJ.10.e77746)
Supplement: Supplementary material 1 — Brief descriptions of different taxa found in the diet of the EIE in Bulgaria [file bdj-10-e77746-s001.xlsx]

## Sheet: Sheet1
N	Taxon	Elhovo-Yambol plane			Sliven plane			Sakar Mnt.			Dervent Heights/Western Strandja			Easthern Rhodope Mnt.			Sredna Gora Mnt.			TOTAL
		N of prey item	% of presence	% of biomass	N of prey item	% of presence	% of biomass	N of prey item	% of presence	% of biomass	N of prey item	% of presence	% of biomass	N of prey item	% of presence	% of biomass	N of prey item	% of presence	% of biomass	N of prey item	% of presence	% of biomass
	Malacostraca
1	Carcinus maenas/aestuarii	0	0	0	0	0	0	0	0	0	1	0.0876424	0.00263429	0	0	0	0	0	0	1	0.0204457	0.00082132
	Insecta
2	Orthoptera	4	0.487211	0	1	0.178253	0	2	0.101989	0	0	0	0	0	0	0	1	0.278552	0	8	0.163566	0
3	Oedipoda caerulescens	0	0	0	3	0.534759	0	0	0	0	0	0	0	0	0	0	0	0	0	3	0.0613371	0
4	Coleoptera ident.	2	0.243605	0	9	1.60428	0	1	0.0509944	0	0	0	0	0	0	0	0	0	0	12	0.245349	0
5	Grillotalpa grillotalpa	1	0.121803	0	0	0	0	0	0	0	0	0	0	0	0	0	0	0	0	1	0.0204457	0
	Actinopterygii
6	Carassius carassius	1	0.121803	0.120483	0	0	0	0	0	0	0	0	0	0	0	0	0	0	0	1	0.0204457	0.020533
7	Carassius gibelio	13	1.58343	1.49399	0	0	0	0	0	0	0	0	0	0	0	0	0	0	0	13	0.265794	0.254609
8	Cyprinus carpio	7	0.852619	0.843384	0	0	0	0	0	0	0	0	0	0	0	0	0	0	0	7	0.14312	0.143731
9	Ctenopharyngodon idella	2	0.243605	0.240967	0	0	0	0	0	0	0	0	0	0	0	0	0	0	0	2	0.0408914	0.041066
10	Squalius cephalus	1	0.121803	0.0602417	0	0	0	0	0	0	0	0	0	0	0	0	0	0	0	1	0.0204457	0.0102665
11	Sander luciperca	1	0.121803	0.120483	0	0	0	0	0	0	0	0	0	0	0	0	0	0	0	1	0.0204457	0.020533
12	Esox lucius	1	0.121803	0.120483	0	0	0	0	0	0	0	0	0	0	0	0	0	0	0	1	0.0204457	0.020533
13	Hypophthalmichthys molitrix	11	1.33983	1.22893	0	0	0	0	0	0	0	0	0	0	0	0	0	0	0	11	0.224903	0.209437
14	Actinopterygii ident.	0	0	0	0	0	0	1	0.0509944	0.0126398	0	0	0	0	0	0	0	0	0	1	0.0204457	0.00513325
	Amphibia
15	Pelophylax ridibundus	0	0	0	0	0	0	1	0.0509944	0.00202236	0	0	0	0	0	0	0	0	0	1	0.0204457	0.00082132
16	Bufo bufo	0	0	0	0	0	0	2	0.101989	0.00505591	0	0	0	0	0	0	0	0	0	2	0.0408914	0.0020533
	Reptilia
17	Pseudopus apodus	5	0.609013	0.271088	0	0	0	68	3.46762	1.52436	24	2.10342	0.711258	0	0	0	0	0	0	97	1.98323	0.887025
18	Anguis fragilis	0	0	0	0	0	0	0	0	0	1	0.0876424	0.0296357	0	0	0	0	0	0	1	0.0204457	0.00923985
19	Lacerta trilineata	0	0	0	2	0.356506	0.0236658	1	0.0509944	0.00202236	0	0	0	0	0	0	0	0	0	3	0.0613371	0.00246396
20	Lacerta viridis	1	0.121803	0.00481934	0	0	0	2	0.101989	0.00404473	0	0	0	0	0	0	0	0	0	3	0.0613371	0.00246396
21	Lacerta sp.	0	0	0	0	0	0	3	0.152983	0.0055615	0	0	0	0	0	0	0	0	0	3	0.0613371	0.00225863
22	Coronella austriaca	1	0.121803	0.0120483	0	0	0	0	0	0	0	0	0	0	0	0	0	0	0	1	0.0204457	0.0020533
23	Dolichophis caspius	25	3.04507	2.25906	10	1.78253	2.21867	62	3.16165	2.38892	19	1.66521	0.915415	0	0	0	0	0	0	116	2.3717	1.79458
24	Elaphe sauromates	5	0.609013	0.451813	2	0.356506	0.443733	10	0.509944	0.379193	5	0.438212	0.246965	0	0	0	0	0	0	22	0.449806	0.338794
25	Zamenis longissimus	0	0	0	0	0	0	0	0	0	1	0.0876424	0.0493929	0	0	0	0	0	0	1	0.0204457	0.0153997
26	Malpolon insignitus	0	0	0	0	0	0	2	0.101989	0.0758387	0	0	0	0	0	0	0	0	0	2	0.0408914	0.0307995
27	Vipera ammodytes	1	0.121803	0.0301209	0	0	0	1	0.0509944	0.0126398	0	0	0	0	0	0	0	0	0	2	0.0408914	0.0102665
28	Natrix natrix	3	0.365408	0.021687	0	0	0	3	0.152983	0.00910064	0	0	0	0	0	0	0	0	0	6	0.122674	0.00739188
29	Natrix tessellata	1	0.121803	0.00843384	0	0	0	0	0	0	0	0	0	0	0	0	0	0	0	1	0.0204457	0.00143731
	Natrix sp.	0	0	0	1	0.178253	0.0192284	2	0.101989	0.00606709	1	0.0876424	0.00428072	0	0	0	0	0	0	4	0.0817829	0.00513325
30	Serpentes fam. ident.	16	1.94884	1.4458	4	0.713012	0.887466	26	1.32585	0.985903	15	1.31464	0.740894	0	0	0	2	0.557103	1.02603	63	1.28808	0.970184
31	Emys orbicularis	1	0.121803	0.120483	0	0	0	4	0.203978	0.126398	0	0	0	0	0	0	0	0	0	5	0.102229	0.0718655
32	Testudo hermanni	5	0.609013	0.963867	0	0	0	17	0.866905	0.894896	21	1.84049	2.70015	0	0	0	0	0	0	43	0.879166	1.36955
33	Testudo graeca	5	0.609013	1.08435	0	0	0	16	0.81591	1.0946	12	1.05171	0.928587	0	0	0	0	0	0	33	0.674709	0.918851
	Testudo hermanni/graeca	2	0.243605	0.228919	0	0	0	9	0.45895	0.475256	13	1.13935	1.44886	0	0	0	1	0.278552	0.684018	25	0.511143	0.704282
	Aves	0
34	Anas platyrhynchos	9	1.09622	1.17327	1	0.178253	0.32008	3	0.152983	0.145812	1	0.0876424	0.0770529	0	0	0	0	0	0	14	0.28624	0.305408
35	Anas crecca	1	0.121803	0.0367474	0	0	0	0	0	0	0	0	0	0	0	0	0	0	0	1	0.0204457	0.00626256
36	Spatula querquedula	0	0	0	0	0	0	0	0	0	1	0.0876424	0.0225232	0	0	0	0	0	0	1	0.0204457	0.00702228
37	Anas sp.	0	0	0	1	0.178253	0.32008	2	0.101989	0.10941	1	0.0876424	0.0712575	0	0	0	0	0	0	4	0.0817829	0.0888668
38	Anser erythropus	1	0.121803	0.212171	0	0	0	0	0	0	0	0	0	0	0	0	0	0	0	1	0.0204457	0.0361586
39	Anser anser	0	0	0	0	0	0	3	0.152983	0.50185	0	0	0	0	0	0	0	0	0	3	0.0613371	0.20381
40	Anser anser domestica	0	0	0	0	0	0	6	0.305966	1.0035	2	0.175285	0.142515	0	0	0	0	0	0	8	0.163566	0.451972
41	Anser sp.	0	0	0	0	0	0	1	0.0509944	0.054705	1	0.0876424	0.0712575	0	0	0	0	0	0	2	0.0408914	0.0444334
42	Phalacrocorax carbo	0	0	0	0	0	0	1	0.0509944	0.10668	0	0	0	0	0	0	0	0	0	1	0.0204457	0.0433246
43	Ciconia nigra	0	0	0	1	0.178253	0.942785	2	0.101989	0.322264	1	0.0876424	0.192698	0	0	0	0	0	0	4	0.0817829	0.256395
44	Ciconia ciconia	45	5.48112	18.7231	3	0.534759	3.05998	106	5.40541	18.1957	157	13.7599	34.3933	0	0	0	3	0.835655	7.07548	314	6.41996	21.7284
45	Ardea cinerea	1	0.121803	0.178797	0	0	0	6	0.305966	0.450178	2	0.175285	0.195464	0	0	0	0	0	0	9	0.184011	0.274239
46	Ardea purpurea	0	0	0	0	0	0	0	0	0	2	0.175285	0.140408	0	0	0	0	0	0	2	0.0408914	0.0437763
47	Ardea alba	0	0	0	0	0	0	0	0	0	1	0.0876424	0.0575592	0	0	0	0	0	0	1	0.0204457	0.0179458
48	Egretta garzetta	0	0	0	0	0	0	6	0.305966	0.0946466	0	0	0	0	0	0	0	0	0	6	0.122674	0.0384378
49	Nycticorax nycticorax	1	0.121803	0.065784	0	0	0	3	0.152983	0.0828158	0	0	0	0	0	0	0	0	0	4	0.0817829	0.0448441
50	Accipiter gentilis	0	0	0	1	0.178253	0.270086	1	0.0509944	0.0461605	3	0.262927	0.202313	0	0	0	0	0	0	5	0.102229	0.100571
51	Accipiter nisus	1	0.121803	0.0391571	0	0	0	2	0.101989	0.0196169	1	0.0876424	0.015674	1	2.08333	0.395529	0	0	0	5	0.102229	0.0243727
52	Accipiter sp.	0	0	0	0	0	0	0	0	0	1	0.0876424	0.00987858	0	0	0	0	0	0	1	0.0204457	0.00307995
53	Aquila heliaca	6	0.730816	1.37954	0	0	0	3	0.152983	0.400175	5	0.438212	0.493929	0	0	0	0	0	0	14	0.28624	0.551619
54	Clanga pomarina	0	0	0	0	0	0	0	0	0	2	0.175285	0.180449	0	0	0	0	0	0	2	0.0408914	0.0562604
55	Aquila/Clanga	0	0	0	1	0.178253	0.739555	1	0.0509944	0.111533	2	0.175285	0.180449	0	0	0	0	0	0	4	0.0817829	0.152889
56	Hieraaetus pennatus	0	0	0	0	0	0	1	0.0509944	0.0422169	0	0	0	0	0	0	0	0	0	1	0.0204457	0.017145
57	Circaetus gallicus	1	0.121803	0.204822	0	0	0	0	0	0	0	0	0	0	0	0	0	0	0	1	0.0204457	0.0349061
58	Buteo buteo	6	0.730816	0.632538	1	0.178253	0.258844	5	0.254972	0.221196	7	0.613497	0.397185	0	0	0	0	0	0	19	0.388469	0.339431
59	Buteo rufinus	4	0.487211	0.566272	0	0	0	6	0.305966	0.260632	1	0.0876424	0.0681622	0	0	0	0	0	0	11	0.224903	0.223604
60	Circus aeruginosus	0	0	0	0	0	0	2	0.101989	0.061581	2	0.175285	0.0869974	0	0	0	1	0.278552	0.487021	5	0.102229	0.0667528
61	Circus pygargus	3	0.365408	0.103134	0	0	0	0	0	0	1	0.0876424	0.0171887	1	2.08333	0.437428	0	0	0	5	0.102229	0.0282945
62	Falco columbarius	1	0.121803	0.0262654	0	0	0	0	0	0	0	0	0	0	0	0	0	0	0	1	0.0204457	0.00447619
63	Falco tinnunculus	4	0.487211	0.0936156	3	0.534759	0.178381	4	0.203978	0.0372115	2	0.175285	0.0219963	1	2.08333	0.308378	0	0	0	14	0.28624	0.0540839
64	Tyto alba	1	0.121803	0.0430126	1	0.178253	0.103538	4	0.203978	0.0707828	0	0	0	0	0	0	0	0	0	6	0.122674	0.043263
65	Athene noctua	1	0.121803	0.0197593	1	0.178253	0.0485148	2	0.101989	0.0165834	0	0	0	0	0	0	1	0.278552	0.112179	5	0.102229	0.0168371
66	Otus scops	1	0.121803	0.0110845	0	0	0	0	0	0	0	0	0	0	0	0	0	0	0	1	0.0204457	0.00188904
67	Asio otus	9	1.09622	0.324221	3	0.534759	0.265352	1	0.0509944	0.0151172	3	0.262927	0.0590739	1	2.08333	0.501115	0	0	0	17	0.347577	0.104369
68	Strix aluco	1	0.121803	0.0631333	1	0.178253	0.140515	0	0	0	0	0	0	0	0	0	0	0	0	2	0.0408914	0.0205125
69	Gallus gallus domestica	2	0.243605	0.542175	4	0.713012	3.54987	41	2.09077	5.4351	12	1.05171	2.00864	12	25	41.8992	6	1.67131	9.57625	77	1.57432	3.97313
70	Meleagris gallopavo domestica	2	0.243605	0.722901	0	0	0	4	0.203978	0.910064	1	0.0876424	0.263429	1	2.08333	10.1396	0	0	0	8	0.163566	0.699148
71	Phasianus colchicus	4	0.487211	0.568923	0	0	0	14	0.713921	0.794182	2	0.175285	0.125524	0	0	0	0	0	0	20	0.408914	0.458625
72	Perdix perdix	10	1.21803	0.487958	15	2.6738	1.79712	11	0.560938	0.225241	5	0.438212	0.133361	2	4.16667	0.678767	0	0	0	43	0.879166	0.349266
73	Coturnix coturnix	1	0.121803	0.0120483	2	0.356506	0.0591644	5	0.254972	0.0252796	1	0.0876424	0.00658572	1	2.08333	0.167597	0	0	0	10	0.204457	0.020533
74	Alectoris chukar	2	0.243605	0.121206	0	0	0	1	0.0509944	0.0254312	0	0	0	0	0	0	0	0	0	3	0.0613371	0.0309843
75	Pavo cristatus domestica	0	0	0	0	0	0	0	0	0	0	0	0	1	2.08333	7.02901	0	0	0	1	0.0204457	0.0861154
76	Fulica atra	0	0	0	0	0	0	0	0	0	1	0.0876424	0.0550566	0	0	0	0	0	0	1	0.0204457	0.0171656
77	Scopolax rusticola	0	0	0	0	0	0	0	0	0	0	0	0	1	2.08333	0.51955	0	0	0	1	0.0204457	0.00636523
78	Chroicocephalus ridibundus	0	0	0	1	0.178253	0.0840135	1	0.0509944	0.0143588	0	0	0	0	0	0	0	0	0	2	0.0408914	0.0116627
79	Ichthyaetus melanocephalus	1	0.121803	0.0308438	0	0	0	0	0	0	0	0	0	0	0	0	0	0	0	1	0.0204457	0.00525645
80	Larus michahellis	1	0.121803	0.110845	3	0.534759	1.02414	32	1.63182	1.65409	53	4.64505	3.67352	0	0	0	0	0	0	89	1.81967	1.90706
81	Larus canus	1	0.121803	0.0409644	0	0	0	0	0	0	1	0.0876424	0.0223915	0	0	0	0	0	0	2	0.0408914	0.0139624
82	Larus sp.	1	0.121803	0.139038	0	0	0	5	0.254972	0.279895	2	0.175285	0.134151	1	2.08333	1.93407	1	0.278552	0.789357	10	0.204457	0.226582
83	Burhinus oedicnemus	0	0	0	0	0	0	1	0.0509944	0.0232066	0	0	0	0	0	0	0	0	0	1	0.0204457	0.00942464
84	Columba livia domestica	17	2.07065	0.725551	22	3.92157	2.30386	20	1.01989	0.354874	4	0.35057	0.0933855	0	0	0	10	2.78552	2.42826	73	1.49254	0.52969
85	Streptopelia turtur	0	0	0	3	0.534759	0.117146	3	0.152983	0.0200214	1	0.0876424	0.00869315	0	0	0	0	0	0	7	0.14312	0.0189725
86	Streptopelia decaocto	1	0.121803	0.017952	1	0.178253	0.0440775	1	0.0509944	0.00753331	0	0	0	0	0	0	0	0	0	3	0.0613371	0.00917825
87	Columba palumbus	6	0.730816	0.354221	5	0.891266	0.724764	5	0.254972	0.12387	4	0.35057	0.12908	0	0	0	0	0	0	20	0.408914	0.201223
88	Columba oenas	0	0	0	0	0	0	1	0.0509944	0.0147127	0	0	0	0	0	0	0	0	0	1	0.0204457	0.0059751
	Columba sp.	0	0	0	0	0	0	1	0.49	0.02	1	0.0876424	0.03227	0	0	0	0	0	0	2	0.0408914	0.0201223
89	Dendrocopos syriacus	0	0	0	0	0	0	1	0.0509944	0.00389305	0	0	0	0	0	0	0	0	0	1	0.0204457	0.00158104
90	Dendrocopos major	1	0.121803	0.00987964	0	0	0	2	0.101989	0.00829169	1	0.0876424	0.00540029	0	0	0	1	0.278552	0.0560895	5	0.102229	0.00841853
91	Dryobates minor	0	0	0	0	0	0	0	0	0	0	0	0	1	2.08333	0.0335194	0	0	0	1	0.0204457	0.00041066
92	Picus viridis	0	0	0	1	0.178253	0.0520647	1	0.0509944	0.0088984	1	0.0876424	0.0115909	0	0	0	0	0	0	3	0.0613371	0.0108414
93	Merops apiaster	0	0	0	0	0	0	0	0	0	1	0.0876424	0.003688	0	0	0	0	0	0	1	0.0204457	0.00114985
94	Coracias garrulus	1	0.121803	0.0175906	2	0.356506	0.0863801	2	0.101989	0.0147633	0	0	0	0	0	0	0	0	0	5	0.102229	0.0149891
95	Upupa epops	1	0.121803	0.00734949	0	0	0	2	0.101989	0.00616821	0	0	0	0	0	0	0	0	0	3	0.0613371	0.00375754
96	Tachymarptis melba	1	0.121803	0.0125303	0	0	0	0	0	0	0	0	0	0	0	0	0	0	0	1	0.0204457	0.00213543
97	Acrocephalus arundinaceus	0	0	0	0	0	0	1	0.0509944	0.00151677	0	0	0	0	0	0	0	0	0	1	0.0204457	0.00061599
98	Erithacus rubecula	0	0	0	1	0.178253	0.0053248	0	0	0	0	0	0	0	0	0	0	0	0	1	0.0204457	0.000369594
99	Sylvia atricapilla	0	0	0	0	0	0	1	0.0509944	0.000859505	0	0	0	0	0	0	0	0	0	1	0.0204457	0.000349061
100	Sylvia nisoria	0	0	0	0	0	0	1	0.0509944	0.00131454	0	0	0	0	0	0	0	0	0	1	0.0204457	0.000533858
101	Sylvia melanocephala	0	0	0	1	0.178253	0.00354987	0	0	0	0	0	0	0	0	0	0	0	0	1	0.0204457	0.000246396
102	Oenanthe oenanthe	0	0	0	0	0	0	1	0.0509944	0.00116286	1	0.0876424	0.00151472	0	0	0	0	0	0	2	0.0408914	0.00519485
103	Hirundo rustica	0	0	0	0	0	0	1	0.0509944	0.000910064	0	0	0	0	0	0	0	0	0	1	0.0204457	0.000369594
104	Turdus merula	1	0.121803	0.0136146	1	0.178253	0.0334279	12	0.611933	0.0685582	4	0.35057	0.0297675	1	2.08333	0.189384	0	0	0	19	0.388469	0.0440843
105	Turdus philomelos	1	0.121803	0.0057832	0	0	0	3	0.152983	0.00733107	0	0	0	1	2.08333	0.113966	1	0.278552	0.0465132	6	0.122674	0.00675535
106	Turdus viscivorus	0	0	0	0	0	0	2	0.101989	0.0119319	0	0	0	0	0	0	0	0	0	2	0.0408914	0.00484579
107	Turdus sp.	2	0.243605	0.0255425	1	0.178253	0.0313571	4	0.203978	0.0214876	1	0.0876424	0.00744186	0	0	0	0	0	0	8	0.163566	0.0132232
108	Carduelis carduelis	0	0	0	0	0	0	5	0.254972	0.00404473	0	0	0	0	0	0	0	0	0	5	0.102229	0.00164264
109	Carduelis chloris	0	0	0	0	0	0	1	0.0509944	0.00131454	1	0.0876424	0.00171229	0	0	0	0	0	0	2	0.0408914	0.00106772
110	Carduelinae gen. indet.	1	0.121803	0.00192773	0	0	0	0	0	0	0	0	0	0	0	0	0	0	0	1	0.0204457	0.000328528
111	Sturnus vulgaris	12	1.46163	0.124339	17	3.0303	0.432492	14	0.713921	0.0608732	4	0.35057	0.0226549	0	0	0	1	0.278552	0.0595096	48	0.981394	0.0847807
112	Lanius collurio	0	0	0	0	0	0	1	0.0509944	0.00141566	0	0	0	0	0	0	0	0	0	1	0.0204457	0.000574924
113	Lanius excubitor	1	0.121803	0.00759046	0	0	0	0	0	0	0	0	0	0	0	0	0	0	0	1	0.0204457	0.00129358
114	Motacilla alba	1	0.121803	0.00253015	1	0.178253	0.00621226	0	0	0	0	0	0	0	0	0	0	0	0	2	0.0408914	0.000862386
115	Passer hispaniolensis	0	0	0	1	0.178253	0.00709973	1	0.0509944	0.00121342	0	0	0	0	0	0	0	0	0	2	0.0408914	0.000985584
116	Passer domesticus	0	0	0	4	0.713012	0.0331321	3	0.152983	0.00424697	0	0	0	0	0	0	0	0	0	7	0.14312	0.00402447
117	Passer montanus	1	0.121803	0.00265064	0	0	0	1	0.0509944	0.0011123	0	0	0	0	0	0	0	0	0	2	0.0408914	0.000903452
118	Passer sp.	1	0.121803	0.00228919	0	0	0	3	0.152983	0.00293243	2	0.175285	0.00316115	0	0	0	0	0	0	6	0.122674	0.00256662
119	Parus major	0	0	0	0	0	0	1	0.0509944	0.000910064	0	0	0	0	0	0	0	0	0	1	0.0204457	0.000369594
120	Aegithalos caudatus	1	0.121803	0.00103616	0	0	0	1	0.0509944	0.000455032	1	0.0876424	0.000566372	0	0	0	0	0	0	3	0.0613371	0.000529751
121	Emberiza calandra	1	0.121803	0.00590369	1	0.178253	0.0144953	5	0.254972	0.012387	0	0	0	0	0	0	0	0	0	7	0.14312	0.00704282
122	Emberiza sp.	0	0	0	0	0	0	0	0	0	2	0.175285	0.00645401	1	2.08333	0.0335194	0	0	0	3	0.0613371	0.00242289
123	Galerida cristata	0	0	0	0	0	0	1	0.0509944	0.00242684	1	0.0876424	0.00316115	0	0	0	0	0	0	2	0.0408914	0.00197117
124	Alauda arvensis	0	0	0	1	0.178253	0.0118329	0	0	0	1	0.0876424	0.00263429	0	0	0	0	0	0	2	0.0408914	0.00164264
125	Melanocorypha calandra	0	0	0	1	0.178253	0.018341	2	0.101989	0.00626933	0	0	0	0	0	0	0	0	0	3	0.0613371	0.00381914
126	Coccothraustes coccothraustes	0	0	0	0	0	0	0	0	0	1	0.0876424	0.00375386	0	0	0	0	0	0	1	0.0204457	0.00117038
127	Phoenicurus phoenicurus/ochruros	1	0.121803	0.00204822	0	0	0	0	0	0	0	0	0	0	0	0	0	0	0	1	0.0204457	0.000349061
128	Anthus campestris	1	0.121803	0.00277112	0	0	0	0	0	0	0	0	0	0	0	0	0	0	0	1	0.0204457	0.000472259
129	Anthus trivialis	1	0.121803	0.00277112	0	0	0	0	0	0	0	0	0	0	0	0	0	0	0	1	0.0204457	0.000472259
130	Anthus pratensis	0	0	0	1	0.178253	0.0053248	0	0	0	0	0	0	0	0	0	0	0	0	1	0.0204457	0.000369594
131	Anthus sp.	0	0	0	0	0	0	2	0.101989	0.00232572	0	0	0	0	0	0	0	0	0	2	0.0408914	0.000944518
132	Saxicola rubicola/ rubetra	1	0.121803	0.00204822	0	0	0	0	0	0	0	0	0	0	0	0	0	0	0	1	0.0204457	0.000349061
133	Muscicapidae gen. iden.	1	0.121803	0.00590369	0	0	0	1	0.0509944	0.0024774	2	0.175285	0.00210743	1	2.08333	0.0268155	0	0	0	5	0.102229	0.00299782
134	Oscines (Non-corvidae) fam. Indet.	11	1.33983	0.149761	3	0.534759	0.100284	18	0.917899	0.105871	1	0.0876424	0.00744186	0	0	0	1	0.278552	0.077294	34	0.695154	0.0801197
135	Corvus corax	6	0.730816	0.567477	1	0.178253	0.23222	11	0.560938	0.436578	29	2.54163	1.49924	2	4.16667	2.63127	2	0.557103	1.07391	51	1.04273	0.822038
136	Coloeus monedula	1	0.121803	0.0296389	4	0.713012	0.291089	3	0.152983	0.0373126	2	0.175285	0.0324017	0	0	0	1	0.278552	0.168268	11	0.224903	0.0555623
137	Pica pica	15	1.82704	0.371571	15	2.6738	0.91409	5	0.254972	0.0510141	4	0.35057	0.0542663	0	0	0	0	0	0	39	0.797383	0.164408
138	Garrulus glandarius	0	0	0	0	0	0	8	0.407955	0.0679514	4	0.35057	0.044256	1	2.08333	0.281563	0	0	0	13	0.265794	0.0448441
139	Corvus frugilegus	3	0.365408	0.159159	14	2.49554	1.8761	13	0.662927	0.285254	5	0.438212	0.144161	1	2.08333	0.730722	0	0	0	36	0.736046	0.327091
140	Corvus cornix	3	0.365408	0.206027	5	0.891266	0.843093	4	0.203978	0.115275	3	0.262927	0.112616	0	0	0	0	0	0	15	0.306686	0.175557
141	Pyrrhocorax graculus	0	0	0	0	0	0	0	0	0	1	0.0876424	0.0139617	0	0	0	0	0	0	1	0.0204457	0.00435299
	Corvidae gen. ident.	0	0	0	0	0	0	0	0	0	0	0	0	1	2.08333	1.31564	0	0	0	1	0.0204457	0.0161184
142	Aves ordo indet.	0	0	0	0	0	0	2	0.101989	0.0505591	1	0.0876424	0.0329286	0	0	0	0	0	0	3	0.0613371	0.0307995
	Mammalia
143	Erinaceus roumanicus	168	20.4629	20.7419	88	15.6863	28.4696	563	28.7098	28.4214	423	37.0727	30.1142	2	4.16667	3.29831	13	3.62117	8.93669	1257	25.7003	26.7511
144	Talpa europaea	2	0.243605	0.0313257	3	0.534759	0.115371	3	0.152983	0.0197181	1	0.0876424	0.00856144	0	0	0	2	0.557103	0.177845	11	0.224903	0.0293622
145	Talpa martinorum	0	0	0	0	0	0	0	0	0	2	0.175285	0.00724429	0	0	0	0	0	0	2	0.0408914	0.00225863
	Talpa sp.	1	0.121803	0.0156628	0	0	0	0	0	0	2	0.175285	0.0140276	0	0	0	0	0	0	3	0.0613371	0.00704282
146	Sorex araneus	0	0	0	0	0	0	2	0.101989	0.00151677	0	0	0	0	0	0	0	0	0	2	0.0408914	0.00061599
147	Crocidura leucodon	1	0.121803	0.00240967	2	0.356506	0.0118329	0	0	0	0	0	0	0	0	0	2	0.557103	0.0273607	5	0.102229	0.0020533
148	Crocidura suaveolens	0	0	0	3	0.534759	0.0124245	2	0.101989	0.00141566	0	0	0	0	0	0	0	0	0	5	0.102229	0.00143731
	Crocidura sp.	1	0.121803	0.00168677	0	0	0	2	0.101989	0.00141566	0	0	0	0	0	0	0	0	0	3	0.0613371	0.000862386
149	Lepus europaeus	60	7.31	23.02	24	4.27807	23.4469	113	5.76237	16.0515	55	4.82	10.67	3	6.25	18.4	12	3.34	26.35	267	5.45901	16.4133
150	Oryctolagus cuniculus	3	0.37	0.48	0	0	0	5	0.254972	0.455032	1	0.09	0.13	0	0	0	0	0	0	9	0.184011	0.307995
151	Sciurus vulgaris	2	0.243605	0.061808	0	0	0	1	0.0509944	0.0155722	0	0	0	0	0	0	0	0	0	3	0.0613371	0.0168576
152	Glis glis	0	0	0	0	0	0	1	0.0509944	0.00647157	0	0	0	0	0	0	6	1.67131	0.681282	7	0.14312	0.0230791
153	Dryomys nitedula	0	0	0	0	0	0	0	0	0	2	0.175285	0.00592715	0	0	0	0	0	0	2	0.0408914	0.00184797
154	Spermophilus citellus	49	5.96833	1.53496	152	27.0945	11.6909	318	16.2162	4.18023	41	3.59334	0.702038	4	8.33333	1.74301	138	38.4401	24.4673	702	14.3529	3.74542
155	Cricetulus migratorius	0	0	0	1	0.178253	0.0103538	0	0	0	0	0	0	0	0	0	0	0	0	1	0.0204457	0.000718655
156	Arvicola amphibius	4	0.487211	0.108435	1	0.178253	0.06656	7	0.356961	0.0796306	0	0	0	0	0	0	2	0.557103	0.437771	14	0.28624	0.0685802
157	Microtus arvalis	103	12.5457	0.372294	57	10.1604	0.505856	97	4.94646	0.147127	24	2.10342	0.0474172	3	6.25	0.150837	84	23.3983	1.7032	368	7.52402	0.226068
158	Microtus hartingi	7	0.852619	0.0640972	0	0	0	4	0.203978	0.0109208	12	1.05171	0.0426755	0	0	0	0	0	0	23	0.470251	0.0286641
159	Microtus subterraneus	0	0	0	0	0	0	4	0.203978	0.00384249	0	0	0	0	0	0	0	0	0	4	0.0817829	0.00156051
160	Microtus sp.	13	1.58343	0.0469885	0	0	0	20	1.01989	0.0303355	25	2.19106	0.0493929	0	0	0	30	8.35655	0.615616	88	1.79922	0.0542071
161	Clethrionomys glareolus	0	0	0	0	0	0	0	0	0	0	0	0	0	0	0	3	0.835655	0.0574575	3	0.0613371	0.00172477
162	Micromys minutus	0	0	0	0	0	0	2	0.101989	0.000808946	2	0.175285	0.00105372	0	0	0	1	0.278552	0.00547214	5	0.102229	0.00082132
163	Apodemus sylvaticus	0	0	0	1	0.178253	0.00887466	0	0	0	0	0	0	0	0	0	0	0	0	1	0.0204457	0.00061599
164	Apodemus agrarius	1	0.121803	0.00253015	0	0	0	0	0	0	0	0	0	0	0	0	0	0	0	1	0.0204457	0.000431193
165	Apodemus sp.	4	0.487211	0.0101206	2	0.356506	0.0124245	1	0.0509944	0.00106174	0	0	0	0	0	0	5	1.39276	0.075242	12	0.245349	0.00527698
166	Sylvaemus sp.	1	0.121803	0.00301209	0	0	0	6	0.305966	0.0066738	0	0	0	0	0	0	5	1.39276	0.102603	12	0.245349	0.00630363
167	Muscardinus avellanarius	1	0.121803	0.00325305	0	0	0	0	0	0	0	0	0	0	0	0	0	0	0	1	0.0204457	0.000554391
168	Mus musculus	0	0	0	0	0	0	0	0	0	0	0	0	0	0	0	1	0.278552	0.0218886	1	0.0204457	0.000657056
169	Mus macedonicus	6	0.730816	0.0195183	10	1.78253	0.0946631	2	0.101989	0.00323578	0	0	0	0	0	0	0	0	0	18	0.368023	0.011211
170	Mus sp.	11	1.33983	0.0303618	6	1.06952	0.0567978	1	0.0509944	0.0011123	0	0	0	0	0	0	2	0.557103	0.0300968	20	0.408914	0.010554
171	Rattus norvegicus	0	0	0	3	0.534759	0.177493	0	0	0	0	0	0	0	0	0	0	0	0	3	0.0613371	0.0123198
172	Rattus sp.	0	0	0	0	0	0	1	0.0509944	0.0101118	0	0	0	1	2.08333	0.335194	2	0.557103	0.273607	4	0.0817829	0.0164264
173	Nannospalax leucodon	9	1.09622	0.179159	8	1.42602	0.437817	8	0.407955	0.0748275	25	2.19106	0.30459	0	0	0	0	0	0	50	1.02229	0.186275
174	Myocastor coypus	1	0.121803	0.36145	0	0	0	1	0.0509944	0.151677	0	0	0	0	0	0	0	0	0	2	0.0408914	0.123198
175	Canis aureus	3	0.365408	1.20483	0	0	0	3	0.152983	0.379193	1	0.0876424	0.197572	0	0	0	0	0	0	7	0.14312	0.420926
176	Canis familiaris	5	0.609013	2.28919	2	0.356506	2.07075	6	0.305966	0.783666	4	0.35057	0.790287	0	0	0	0	0	0	17	0.347577	1.09852
177	Canis lupus	1	0.121803	0.481934	0	0	0	0	0	0	0	0	0	0	0	0	0	0	0	1	0.0204457	0.082132
	Canis sp.	0	0	0	0	0	0	8	0.407955	1.06174	3	0.262927	0.658572	1	2.08333	6.70387	2	0.557103	3.07808	14	0.28624	0.811053
178	Felis catus	1	0.121803	0.240967	1	0.178253	0.591644	12	0.611933	0.910064	5	0.438212	0.395143	0	0	0	0	0	0	19	0.388469	0.574924
179	Felis silvestris	5	0.609013	1.80725	2	0.356506	1.18329	2	0.101989	0.227516	3	0.262927	0.329286	0	0	0	0	0	0	12	0.245349	0.58519
	Felis sp.	1	0.121803	0.240967	0	0	0	2	0.101989	0.101118	0	0	0	0	0	0	3	0.835655	2.05205	6	0.122674	0.143731
180	Vulpes vulpes	9	1.09622	3.73499	5	0.891266	4.73315	22	1.12188	3.99417	6	0.525855	1.18543	0	0	0	2	0.557103	4.78813	44	0.899612	3.10048
181	Martes foina	1	0.121803	0.277112	2	0.356506	1.36078	2	0.101989	0.171901	0	0	0	0	0	0	2	0.557103	2.32566	7	0.14312	0.281302
182	Martes foina/martes	0	0	0	0	0	0	1	0.0509944	0.0859505	0	0	0	0	0	0	0	0	0	1	0.0204457	0.0349061
183	Meles meles	3	0.365408	1.20483	0	0	0	3	0.152983	0.606709	3	0.262927	0.658572	0	0	0	0	0	0	9	0.184011	0.657056
184	Mustela nivalis	3	0.365408	0.057832	0	0	0	1	0.0509944	0.00495479	1	0.0876424	0.0105372	0	0	0	2	0.557103	0.134068	7	0.14312	0.0191778
185	Mustela putorius	0	0	0	0	0	0	1	0.0509944	0.0505591	0	0	0	0	0	0	0	0	0	1	0.0204457	0.020533
186	Mustelidae	0	0	0	0	0	0	3	0.152983	0.227516	1	0.0876424	0.0658572	0	0	0	0	0	0	4	0.0817829	0.112931
187	Lutra lutra	1	0.121803	0.722901	0	0	0	0	0.0509944	0.000404473	0	0	0	0	0	0	0	0	0	1	0.0204457	0.123198
188	Microchiroptera fam. indet.	0	0	0	0	0	0	1	0.0509944	0.000404473	0	0	0	0	0	0	0	0	0	1	0.0204457	0.000164264
189	Equus caballus/asinus	0	0	0	0	0	0	2	0.101989	0	0	0	0	0	0	0	0	0	0	2	0.0408914	0
190	Sus scrofa	0	0	0	0	0	0	1	0.0509944	0	2	0.175285	0	0	0	0	0	0	0	3	0.0613371	0
191	Sus scrofa domestica	2	0.243605	0	1	0.178253	0	8	0.407955	0	8	0.701139	0	0	0	0	2	0.557103	0	21	0.42936	0
192	Capra hircus domestica	4	0.487211	0	3	0.534759	0	10	0.509944	0	3	0.262927	0	0	0	0	0	0	0	20	0.408914	0
193	Bos taurus domestica	1	0.121803	0	1	0.178253	0	3	0.152983	0	1	0.0876424	0	1	2.08333	0	0	0	0	7	0.14312	0
194	Ovis aries domestica	1	0.121803	0	0	0	0	3	0.152983	0	5	0.438212	0	0	0	0	1	0.278552	0	10	0.204457	0
	Capra hircus domestica/Ovis aries domestica	0	0	0	1	0.178253	0	9	0.45895	0	4	0.35057	0	0	0	0	4	1.11421	0	18	0.368023	0
195	Capreolus capreolus	0	0	0	0	0	0	0	0	0	2	0.175285	0	0	0	0	0	0	0	2	0.0408914	0
196	Eutheria indet.	0	0	0	0	0	0	4	0.203978	0	0	0	0	0	0	0	0	0	0	4	0.0817829	0
	TOTAL	821	100.006	99.9961	561	100	100	1961	100.49	99.9956	1141	100.002	99.9968	48	100	99.9979	359	99.9974	100.002	4891	100	100
